# Supplementary material
Source: PubMed Central journal article supplement (PMC3888878)
Supplement: NIHMS525718-supplement-1.pdf [file NIHMS525718-supplement-1.pdf]

## 1 **Supplementary Materials and Methods**

2 **Cloning of CLL donor BCR as scFv.** Briefly, for the first round of PCR, the VH region was amplified  
3 using a 5' primer containing a XmaI site, CLL655\_VH\_FR1\_XmaI\_Fwd  
4 (GTCCTCGCAACTGCCCCATCCCGGGGCCCAACCAGCGATGGCCCAGGTGCAGCTGGTGCAG  
5 TCTGG) and 3' primer containing a (Gly<sub>4</sub>-Ser)<sub>3</sub> linker sequence, CLL655\_VH\_scFv\_Rev  
6 (CCGCCGGATCCACCTCCGCCTGAACCGCCTCCACCTGAGGAGACGGTGAC) with the  
7 following cycle profile: 94°C for 5 min, (94°C, 1 min; 55°C, 1 min; and 72°C, 3 min) × 25, 72°C for 7  
8 min. For VL region amplification, a 5' primer containing a (Gly<sub>4</sub>-Ser)<sub>3</sub> linker sequence,  
9 CLL655\_VL\_scFv\_Fwd  
10 (GGAGGCGGTTTCAGGCGGAGGTGGATCCGGCGGTGGCGGATCGGACATCCAGATGACCCAG  
11 TCTCC) and 3' primer containing a SalI site and FLAG tag, CLL655\_VL\_FR4\_SalI\_Rev  
12 (GAGTCATTCTCGACTGCTATGTCGACTTTATCATCATCATCTTTATAATCACGTTTGATATCC  
13 ACTTTGGT) were used with the following cycle profile: 94°C for 5 min, (94°C, 1 min; 55°C, 1 min; and  
14 72°C, 3 min) × 25, 72°C for 7 min. For the second round of PCR, the scFv gene was assembled by  
15 overlap-extension based on the (Gly<sub>4</sub>-Ser)<sub>3</sub> linker sequence homology between the VH and VL PCR  
16 products using the following cycle profile: 94°C for 5 min, (94°C, 1 min; 60°C, 1 min; and 72°C, 3 min)  
17 × 6, 72°C for 7 min. In the third round of PCR, the assembled scFv gene was PCR amplified using the  
18 outside primers, CLL655\_VH\_FR1\_XmaI\_Fwd and CLL655\_VL\_FR4\_SalI\_Rev using the following  
19 cycle profile: 94°C for 5 min, (94°C, 1 min; 55°C, 1 min; and 72°C, 3 min) × 25, 72°C for 7 min. PCR  
20 products were purified by QIAquick Gel Extraction Kit (Qiagen), digested with XmaI and SalI (New  
21 England Biolabs), and cloned into pDISPLAY vector (Invitrogen) using T4 DNA ligase (New England  
22 Biolabs). CLL donor scFv plasmid was purified from transformed NovaBlue competent cells (Novagen)  
23 with the QIAprep Spin Miniprep Kit (Qiagen).

1 **Construction of scFv mutants.** The two scFv mutants were constructed by amplifying the VH and VL  
2 regions from the wildtype CLL donor scFv plasmid utilizing overlap-extension PCR as described above,  
3 except using different primer sets for the first round of PCR. For the 1324 HCDR3 Swap scFv mutant,  
4 the VH region was amplified using a 5' primer containing a XmaI site, CLL655\_VH\_FR1\_XmaI\_Fwd  
5 (GTCCTCGCAACTGCCCCATCCCGGGGCCCAACCAGCGATGGCCCAGGTGCAGCTGGTGCAG  
6 TCTGG) and 3' primer containing the CLL1324 VH CDR3 sequence as overhang, CLL655\_FR3-  
7 1324\_CDR3\_Rev  
8 (TTGTTGATAATAACTCCCTGAACCATAGGACGCCTCTCTCGCACAGTAATA ). The VL region  
9 was amplified using a 5' primer containing the CLL1324 VH CDR3 sequence as overhang,  
10 CLL1324\_CDR3-655\_FR4\_Fwd  
11 (GAGGCGTCCTATGGTTCAGGGAGTTATTATCAACAATACTTTGACTACTGG) and 3' primer  
12 containing a SalI site and FLAG tag, CLL655\_VL\_FR4\_SalI\_Rev  
13 (GAGTCATTCTCGACTGCTATGTCGACTTTATCATCATCATCTTTATAATCACGTTTGATATCC  
14 ACTTTGGT). The 1324 HCDR3 Swap scFv gene was assembled by overlap-extension based on the  
15 CLL1324 VH CDR3 sequence homology between the VH and VL PCR products. For the Donor HCDR3  
16 Swap scFv mutant, the VH region was amplified using a 5' primer containing a XmaI site,  
17 CLL655\_VH\_FR1\_XmaI\_Fwd  
18 (GTCCTCGCAACTGCCCCATCCCGGGGCCCAACCAGCGATGGCCCAGGTGCAGCTGGTGCAG  
19 TCTGG) and 3' primer containing the CLL1324 VH FR4 sequence as overhang, CLL655\_CDR3-  
20 1324\_FR4\_Rev  
21 (TGAGGAGACGGTGACCGTGGTCCCTTTGCCCCAGACGTCCATGTAGTAGTAGTAGTAGTAG  
22 TACCCCAAAAATC). The VL region was amplified using a 5' primer containing the CLL1324 VH  
23 FR4 sequence as overhang and 5' end of a (Gly<sub>4</sub>-Ser)<sub>3</sub> linker sequence, CLL1324\_FR4-GlySer\_Fwd  
24 (TACTACTACTACTACTACATGGACGTCTGGGGCAAAGGGACCACGGTCACCGTCTCCTCAG  
25 GTGGAGGCGGTTCA) and 3' primer containing a SalI site and FLAG tag,  
26 CLL655\_VL\_FR4\_SalI\_Rev

1 (GAGTCATTCTCGACTGCTATGTCGACTTTATCATCATCATCTTTATAATCACGTTTGATATCC  
 2 ACTTTGGT). The Donor HCDR3 Swap scFv gene was assembled by overlap-extension based on the  
 3 (Gly<sub>4</sub>-Ser)<sub>3</sub> linker sequence homology between the VH and VL PCR products.

4 **Quantitative real-time PCR.** RNA from CLL donor MNCs were converted into cDNA as described in  
 5 Materials and Methods. Quantitative real-time PCR was done using the Customized TaqMan® Gene  
 6 Expression Assay (Invitrogen) on a LightCycler® 480 Instrument II (Roche). The sequences for the  
 7 upstream IGHV1 allele-specific primer, downstream IGHJ4 allele-specific primer, and the TaqMan probe  
 8 complementary to the hypervariable V–N–D region of the CLL donor HCDR3 are as follows: upstream  
 9 primer (GCTGAGCAGCCTGAGATCTG), downstream primer (GGCCCCAGTAGTCAAAGTAGTAC),  
 10 and probe (CTGTGCGAGAGTTACAGTCAAG). Two independent quantitative real-time PCR reactions  
 11 with duplicate samples were performed, and the value of the target gene was normalized to the  
 12 glyceraldehyde 3-phosphate dehydrogenase (GAPDH) gene. The fold change in the CLL donor HCDR3  
 13 transcript relative to the GAPDH endogenous control was determined by the following formulas:

$$14 \text{ Fold Change} = 2^{-\Delta(\Delta C_T)}$$

$$15 \Delta C_T = C_{T, \text{ CLL donor HCDR3}} - C_{T, \text{ GAPDH}}$$

$$16 \Delta(\Delta C_T) = \Delta C_{T, \text{ stimulated}} - \Delta C_{T, \text{ control}}$$

1 **Supplementary Figure Legends**

2 **Figure S1: Flow cytometric analysis of monoclonal VLR39 reactivity with different cell types and**  
3 **cell lines.** VLR39 binding (red line) was compared with that of control VLR4 having *Bacillus anthracis*  
4 BclA-specificity (gray shading). Histogram of VLR39 binding to (A) five different healthy donor  
5 lymphocytes gated on B cells (CD3<sup>-</sup>/CD19<sup>+</sup>), T cells (CD3<sup>+</sup>/CD19<sup>-</sup>), and non-B/T cells (CD3<sup>-</sup>/CD19<sup>-</sup>), (B)  
6 four EBV transformed B cells, and (C) four different human B cell leukemia/lymphoma lines, including  
7 pre-B cell leukemia (697), Burkitt's Lymphoma (Daudi, Ramos), and diffuse large B cell lymphoma (SU-  
8 DHL-6).

9 **Table S1: CLL VH gene families and HCDR3 sequences.** The *IGHV*, *IGHD*, and *IGHJ* genes and the  
10 HCDR3 amino acid sequences expressed in the leukemic cells of 26 CLL patients tested for VLR39  
11 reactivity are shown. Shared VH gene family usage between CLL donor and other CLL patients are  
12 highlighted in yellow (*IGHV*), blue (*IGHD*), and green (*IGHJ*).

13 **Figure S2: Flow cytometric analysis of monoclonal VLR39 reactivity with CLL cells with different**  
14 **VH gene sets.** VLR39 binding (red line) was compared with that of control VLR4 having *Bacillus*  
15 *anthracis* BclA-specificity (gray shading). Histogram of VLR39 binding to 26 CLL patients with known  
16 *VH* gene sequences (gated on CD5<sup>+</sup>/CD19<sup>+</sup> lymphocytes).

17 **Figure S3: CLL VH gene sequence analysis.** Sequence alignment between the IGVH-D-J gene  
18 rearrangements of CLL donor and those of the 26 CLL patients tested for VLR39 reactivity by flow  
19 cytometry are shown. Shared *VH* gene family usage between CLL donor and other CLL patients are  
20 highlighted in yellow (*IGHV*), blue (*IGHD*), and green (*IGHJ*). Identical CDR1, CDR2, and IGHJ amino  
21 acid sequences are shown in red.

22 **Figure S4: IGHV-D-J sequence alignment of VLR39 sorted cells.** Sequence alignment between the  
23 IGHV-D-J gene rearrangement of CLL donor and those of the VLR39<sup>+</sup>/CD5<sup>hi</sup> cells sorted from the CLL

1 donor B cells at 58 months after treatment. No significant alignment was possible for the VLR39<sup>7</sup>/CD5<sup>10</sup>  
2 cells. Nucleotide identity to the original CLL donor IGHV-D-J sequencing results is highlighted in gray.

3 **Table S2: Detection of CLL recurrence by quantitative real-time PCR.** Cryopreserved MNCs from  
4 the CLL donor after treatment were analyzed by qPCR for the presence of CLL donor HCDR3 transcript.  
5 Each time point is calculated as months after end of CFAR treatment regimen. The  $C_T$ ,  $\Delta C_T$ , and  $\Delta(\Delta C_T)$   
6 of the qPCR reaction using the CLL donor HCDR3-specific probe and GAPDH probes were used to  
7 calculate the fold change in the CLL donor HCDR3 transcript relative to the GAPDH endogenous control.

**Figure S1**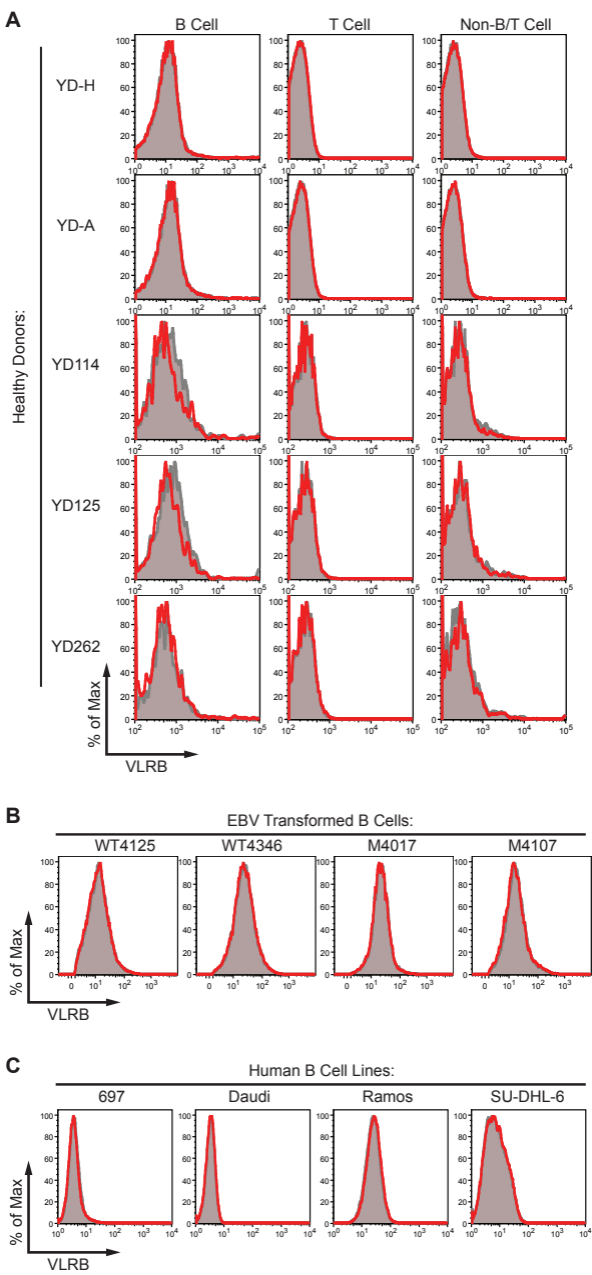

**Table S1. CLL VH gene families and HCDR3 sequences**

| CLL ID | IGHV Gene               | IGHD Gene   | IGHJ Gene | HCDR3 amino acid sequence  |
|--------|-------------------------|-------------|-----------|----------------------------|
| Donor  | IGHV1-69*01             | IGHD3-3*01  | IGHJ4*02  | ARVTVKYYDFWGYFDY           |
| 1153   | IGHV1-69*01             | IGHD3-3*01  | IGHJ4*02  | DDSYYDFWSGWYY              |
| 1012   | IGHV1-69*01             | IGHD3-3*01  | IGHJ6*03  | ARVEIFGVVGLSYYYYYMDV       |
| 1640   | IGHV1-69*01             | IGHD3-3*01  | IGHJ6*03  | ARGAIFGVVIIPVTPFYMDV       |
| 859    | IGHV3-09*01             | IGHD3-3*01  | IGHJ4*02  | AKDASSNYDFWSGYDY           |
| 1371   | IGHV4-b*02              | IGHD3-3*01  | IGHJ4*02  | ARVMEKYYDFWSGYDY           |
| 1324   | IGHV1-69*01             | IGHD3-10*01 | IGHJ6*03  | AREASYGSGSYYQQYYYYYMDV     |
| 1333   | IGHV1-69*01             | IGHD3-10*01 | IGHJ6*02  | AVGVLWFGELLSYYYYYGM        |
| 352    | IGHV1-69*05             | IGHD3-3*01  | IGHJ6*02  | AGRLIFGVVITAGGDYGM         |
| 1301   | IGHV4-31*03             | IGHD3-3*01  | IGHJ3*02  | ARAPIGSTIFGVVIIRFAFDI      |
| 276    | IGHV1-2*02              | IGHD2-21*02 | IGHJ4*02  | ARTQIGDCGDCYPFDY           |
| 336    | IGHV1-3*01              | IGHD6-19*01 | IGHJ4*02  | AREQWLVLVSYFDY             |
| 606    | IGHV1-2*04              | IGHD3-10*01 | IGHJ4*02  | ARDLRSYGSGSTPFLDS          |
| 758    | IGHV1-18*01             | IGHD3-16*01 | IGHJ4*02  | ARKSWVGAYYFDY              |
| 854    | IGHV1-3*01              | IGHD2-2*01  | IGHJ4*02  | VSHYCTSSCDQMY              |
| 1222   | IGHV1-2*02              | IGHD6-19*01 | IGHJ4*02  | AREQWLASPNLDY              |
| 1271   | IGHV4-34*02             | IGHD6-6*01  | IGHJ4*02  | ARGRWSPKFVL                |
| 1299   | IGHV3-23*01/IGHV3-23*02 | IGHD2-2*01  | IGHJ4*03  | AKGLVIGLPDV                |
| 1330   | IGHV3-7*03              | IGHD2-8*01  | IGHJ4*02  | ARSSRDGTNDYDGEYRYFDY       |
| 1240   | IGHV3-33*01/IGHV3-33*06 | IGHD3-9*01  | IGHJ2*01  | ATRPQLNYDILTGYYIGGGYFDL    |
| 1294   | IGHV3-21*01             | IGHD7-27*01 | IGHJ6*03  | ARDPYRGLYGMFYFYMDV         |
| 1317   | IGHV4-59*01             | IGHD2-21*02 | IGHJ3*02  | ARNPYCGGDCYSDAFDI          |
| 1319   | IGHV4-31*03             | IGHD2-2*02  | IGHJ6*02  | ARDLYGWTYCSSTSCYRYYGMDV    |
| 1326   | IGHV3-53*04             | IGHD5-12*01 | IGHJ6*02  | ARDRVDIVATTTYYYYYYGM       |
| 1344   | IGHV1-69*02             | IGHD2-21*02 | IGHJ5*02  | ARSTNLDYFFAAVTGNWFDP       |
| 1358   | IGHV4-34*02             | IGHD2-8*01  | IGHJ6*02  | TRAMDYYYYGMDV              |
| 1397   | IGHV1-69*06             | IGHD3-22*01 | IGHJ6*02  | ATPPRGTYDSSGYYYGGLDNYYGMDV |

Figure S2

CLL Patients:

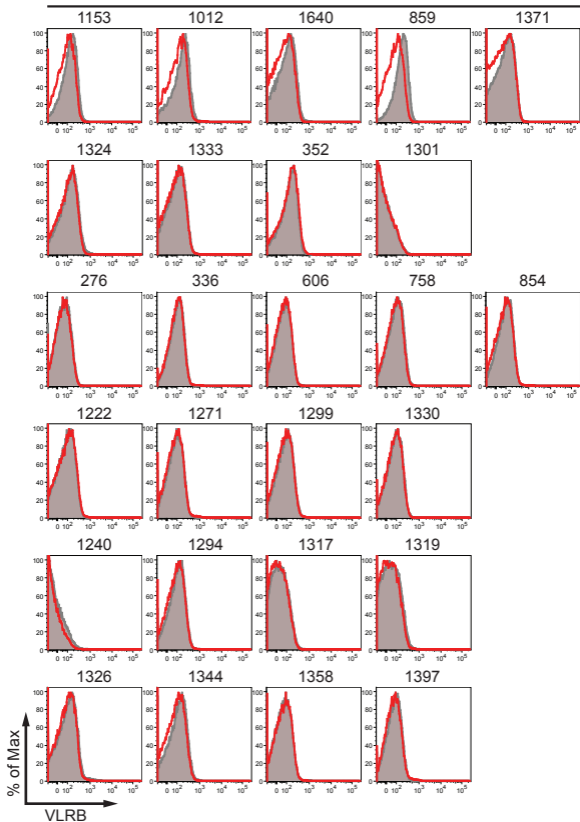



Figure S3

| Donor | Sequence                                                                                                                                                                    |
|-------|-----------------------------------------------------------------------------------------------------------------------------------------------------------------------------|
| 1153  | QVQLVQSGAEVKKPKGSSVKVSKCAKASGGTFSS. . . YAIISWVRQA PGQGLEWMMGGIIPIFGTANAQKFGQGRVTITADESTSTAYMELSLRSEDTAVYYCARVT. . . VKYDFWGY YFDYWGQGLVTVVSS                               |
| 1012  | QVQLVQSGAEVKKPKGSSVKVSKCAKASGGTFSS. . . YAIISWVRQA PGQGLEWMMGGIIPIFGTANAQKFGQGRVTITADESTSTAYMELSLRSEDTAVYYCARDDSYD. . . FW. . . SGWYYWGQGLVTVVSS                            |
| 1640  | QVQLVQSGAEVKKPKGSSVKVSKCAKASGGTFSS. . . YAIISWVRQA PGQGLEWMMGGIIPIFGTANAQKFGQGRVTITADESTSTAYMELSLRSEDTAVYYCARVEIFGV. . . VGLSYYYYYMDVWGKGT. . . VVLPVTPFFYMDVWGKGT. . . . . |
| 859   | EVQLVESGGGLVQPGRLSLRSLRSCAASGFTFDD. . . YAMHWVRQA PGKGLEWVSGISWNSGSIYADSVKGRFTISRDNKAKNSLYLQMNLSRAEDTALYYCAKDASSNYD. . . . . FWSGYYDYWGQGLVTVVSS                            |
| 1371  | QVQLQESGPGLVKPSSETLSLTCTVSGYSISG. . . YWGWIRQPPGKGLEWIGSIYHSGS. . . TYNPSLKSRTVTSVDTSKNQFSLKLSVTAADTAVYYCARVMEKY. . . . . YDFWSGYY YFDYWGQGL. . . . .                       |
| 1324  | QVQLVQSGAEVKKPKGSSVKVSKCAKASGGTFSS. . . YAIISWVRQA PGQGLEWMMGGIIPIFGTANAQKFGQGRVTITADESTSTAYMELSLRSEDTAVYYCAR EASYGSG. . . SYQQYYYYMDVWGKGT. . . . .                        |
| 1333  | QVQLVQSGAEVKKPKGSSVKVSKCAKASGGTFSS. . . YAIISWVRQA PGQGLEWMMGGIIPIFGTANAQKFGQGRVTITADESTSTAYMELSLRSEDTAVYYCA VGLWFG. . . . . ELLFSYYYYYGMDVWGQGT. . . . .                   |
| 352   | QVQLVQSGAEVKKPKGSSVKVSKCAKASGGTFSS. . . YAIISWVRQA PGQGLEWMMGGIIPIFGTANAQKFGQGRVTITADESTSTAYMELSLRSEDTAVYYCAGRLIFGV. . . . . VITAGGDYGMDVWGQGLVTVVSS                        |
| 1301  | QVQLQESGPGLVKPSQTLTLTCAVSGGSISSGGYYWVSWIRHPKGLGEWIGIYIYSGS. . . TYNPSLKSRTVTSVDTSKNQFSLKLSVTAADTAVYYCARAPIGST. . . I. . . FGVVIIRFAFDIWGQGLVTVVSS                           |
| 276   | QVQLVQSGAEVKKPKGASVKVSKCASGYTFAA. . . YMHWVRQA PGQGLEWMMWINPNTGGTYAQKFKGRVTMTRDTSI STAYMELSLRSDTAVYSCARTQIGDCGG. . . . . DCYFPDYWGQGLVTVVSS                                 |
| 336   | QVQLVQSGAEVKNPGASVKVSKCASGYTFT. . . YAMHWVRQA PGQRLEWMMWINAGNNTKYSQKFGQGRVTITRDTASASTAYMELSLRSEDTAVYYCAREQWLVL. . . . . YFDYWGQGLVTVVSS                                     |
| 606   | QVHLTQSGAEVKKPKGASVKVSKCASGYTFSG. . . YLHWVRQA PGQGLEWMMWINPNGGNTYAQKFGWVTLTRDTSI STAYMEMRRLTSDDTAVYFCARDLRYSGG. . . . . STPFLDSWGQGLVTVVTS                                 |
| 758   | QVQLVQSGAEVKKPKGASVKVSKCASGYTFTS. . . YGISWVRQA PGQGLEWMMGWI SAYNGNTNYAQKLGQGRVTMTDTSTAYMELSLRSDDTAVYYCARKSWGAY. . . . . YFDYWGQGLVTVVSS                                    |
| 854   | QVRLVQSGAEVKKPKGASVKASCKTSGYTFTA. . . YAVHWVRQA PGQRLECMGWVNPANADTGYSQKFGQGLTITRDISASTVHMELSLRSEDTAVYYCVSHYCTSSITCD. . . . . QMYWGQGLVTVVSS                                 |
| 1222  | QVQLVQSGAEVKKPKGASVKVSKCASGYTFTG. . . YMHWVRQA PGQGLEWMMGWINPNSGGTNYAQKFGQGRVTMTRDTSI STAYMELSLRSDDTAVYYCAREQWLASP. . . . . NLDYWGQGLVTVVSS                                 |
| 1271  | QVQLQWAGGLLKPSETLSLSCAVYGGSLSG. . . FYWSWIRQPPGKGLEWIGDINPSGG. . . TNYNPSLKSRTVILADTSRNQFSLKVSVTAADTAVYYCARGRWS. . . . . KFVLWGQGLVTVVSS                                    |
| 1299  | EVQLLESGGDLVQPGGSLRSLRSCAASGFTFSS. . . YAMTWVRQA PGKGLEWVSAI SGSGGNTNYGDSVKGRFTISRDNNSNNTLYLQMDSLRPEDTAVYYCAKG. . . . . LVIGLPDVWGQGLVTVVSS                                 |
| 1330  | EMQLVESGGGLVQPGGSLRSLRSCAASGFTFSR. . . YMTWVRQA PGKGLEWVANI QDGSERYVGSVKGRFTISRDNKAKNSLYLQMNLSRAEDTAVYYCARS. . . SRDGT. . . NDYGEYR YFDYWGQGLVTVVSS                         |
| 1240  | QVQLVESGGGVQPGRSLRSLRSCAASGFTFSS. . . YGMHWVRQA PGKGLEWVAI VYDGSNKYYADSVKGRFTISRDNKNTLYLQMNLSRAEDTAVYYCATRPQLNYDIL. . . TGYIIGGGYFDLWGRG. . . . .                           |
| 1294  | EVQLVESGGGLVMPGSLRSLRSCAASGFIQSD. . . YNMHWVRQA PGSGLEWVSSITFNSGHI YYADSVKGRFTISRDNKNTLYLQMNILTAEDTAVYFCARDPYRGLYGM. . . . . FYFYMDVWGKGT. . . . .                          |
| 1317  | QVQLQESGPGLVKPSSETLSLTCTVSGSIS. . . YYWSWIRQPPGKGLEWIGIYIYSGS. . . TNYNPSLKSRTVTSVDTSKNQFSLKLSVTAADTAVYYCARNPY. . . . . CGGDCYSDAFDIWGQGLVTVVSS                             |
| 1319  | QVQLQESGPGLVKPSQTLTLTCTVSGGSISSGGYYWVSWIRHPKGLGEWIGIYIYSGS. . . TYNPSLKSRTVTSVDTSKNQFSLKLSVTAADTAVYYCARNPY. . . . . STSCYRYGMDVWGQGT. . . . .                               |
| 1326  | EVQLVESGGGLVQPGGSLRSLRSCAASGFTVSS. . . NYMSWVRQA PGKGLEWVSVIYSGS. . . TYYADSVKGRFTISRHNKNTLYLQMNLSRAEDTAVYYCARDR. . . VDIVAT. . . TTYYYYYGMDVWGQGT. . . . .                 |
| 1344  | QVQLVQSGAEVKKPKGSSVKVSKCASGGTFSS. . . YTIISWVRQA PGQGLEWMMGRI IPILGIANYAQKFGQGRVTITADKSTSTAYMELSLRSEDTAVYYCARSTN. . . LD. . . . . YFFAAVTGNWFDPWGQGT. . . . .               |
| 1358  | QVLLQWAGGLLEPSDTLSLTCAVYGGSLSG. . . YWIWIRQS PGKGLEWIGIKIYSGS. . . TDYNSLKSRTVTSVDTSKNQFSLKLSVTAADTAVYYCTRAMD. . . . . YYYGMDVWGPGT. . . . .                                |
| 1397  | QVQLVQSGAEVKKPKGSSVKVSKCAKASGGTFSS. . . YAIISWVRQA PGQGLEWMMGGIIPIFGTANAQKFGQGRVTITADKSTSTAYMELSLRSEDTAVYYCATPPRGTYDSSGYYGGLDNYGMDVWGQGLVTVVSS                              |

```

<-----FR1-----><-----CDR1----->
1
CAGGTGCAGCTGGTGCAGTCTGGGGCTGAGGTGAAGAAGCCTGGGTCCCTCGGTGAAGGTCCTCCCTGCAAGGCTTCTGGAGGCACCTTCAGCAGCTATGCTA
100
.....TGAGGTGAAGAAGCCTGGGTCCCTCGGTGAAGGTCCTCCCTGCAAGGCTTCTGGAGGCACCTTCAGCAGCTATGCTA

-----FR2-----><-----CDR2-----><-----FR3-----
101
TCAGCTGGGTGCGACAGGCCCTGGACAAGGGCTTGAGTGGATGGAGGGATCATCCCTATCTTTGGTACAGCAAACTACGCACAGAAAGTTCAGGGCAG
VLR39+
TCAGCTGGGTGCGACAGGCCCTGGACAAGGGCTTGAGTGGATGGAGGGATCATCCCTATCTTTGGTACAGCAAACTACGCACAGAAAGTTCAGGGCAG

-----FR3-----><-----CDR3-----
201
AGTCACGATTACCGCGGACGAAATCCACGAGCACAGCCTACATGGAGCTGAGCAGCCTGAGATCTGAGGACACGGCCGTGTATTACTGTGCGAGAGTTACA
VLR39+
AGTCACGATTACCGCGGACGAAATCCACGAGCACAGCCTACATGGAGCTGAGCAGCCTGAGATCTGAGGACACGGCCGTGTATTACTGTGCGAGAGTTACA

-----CDR3-----><-----FR4----->
301
GTC AAGTATTACGATTTTGGGGTACTACTTTGACTACTGGGGCCAGGGAACCCTGGTCACCGTCTCCTCA
372
GTC AAGTATTACGATTTTGGGGTACTACTTTGACTACTGGGGCCAGGGAACCCTGGTCACCGTCTC
VLR39+

```

**Table S2. Detection of CLL recurrence by quantitative real-time PCR**

| <b>Months After End of CFAR Treatment</b> | <b>Donor CLL HCDR3 (C<sub>T</sub>)</b> | <b>GAPDH (C<sub>T</sub>)</b> | <b>ΔC<sub>T</sub></b> | <b>Δ(ΔC<sub>T</sub>)</b> | <b>Fold Change</b> | <b>CLL HCDR3 Detection</b> |
|-------------------------------------------|----------------------------------------|------------------------------|-----------------------|--------------------------|--------------------|----------------------------|
| 38                                        | not detectable                         | 18.7 ± 0.1                   | 0.00                  | 0                        | 0                  | negative                   |
| 51                                        | 37.48                                  | 25.4 ± 0.4                   | 12.10                 | 2.02                     | 0.25               | weak positive              |
| 56                                        | 26.4 ± 0.1                             | 18.4 ± 0.2                   | 8.02                  | -2.02                    | 4.05               | positive                   |
